# Supplementary material for: Effects of Copper Addition on Copper Resistance, Antibiotic Resistance Genes, and intl1 during Swine Manure Composting
Source: PubMed Central journal article supplement (PMC5335643; doi:10.3389/fmicb.2017.00344), 2017-03-03
Supplement: Data_Sheet_1.pdf [file Data_Sheet_1.pdf]

## Supporting Information for

### Effects of copper addition on copper resistance, antibiotic resistance genes and *intI1* during swine manure composting

**Authors:** Yanan Yin<sup>1</sup>, Jie Gu\*<sup>1</sup>, Xiaojuan Wang<sup>1</sup>, Wen Song<sup>2</sup>, Kaiyu Zhang<sup>1</sup>, Wei Sun<sup>1</sup>, Xin Zhang<sup>2</sup>, Yajun Zhang<sup>1</sup>, Haichao Li<sup>1</sup>

\*Correspondence author: Jie Gu

#### **Affiliation and address:**

1. College of Resources and Environmental Sciences, Northwest A & F University, Yangling, Shaanxi 712100, China

2. College of Science, Northwest A&F University, Yangling 712100, China

**Email:** gujie205@sina.com

Tel: 86-029-87081265

Address: College of Resources and Environmental Sciences, Northwest A & F University, Yangling, Shaanxi 712100, China

Fax: 86-029-87081265

### **S1. Detailed conditions employed for qPCR**

The qPCR reaction mixture comprised 1  $\mu\text{L}$  of DNA template, 0.25  $\mu\text{L}$  of each 0.2  $\mu\text{M}$  primer (ShengGong, China), 10  $\mu\text{L}$  of SuperReal PreMix Plus (TianGen, China), and 8.5  $\mu\text{L}$  of RNase-free water. The qPCR conditions comprised an initial hold for 15 min at 95°C, followed by 40 cycles for 10 s at 95°C, 20 s at the annealing temperatures shown in Table S1, and then 32 s at 72°C. The presence of inhibitory compounds in the extracted DNA was tested by qPCR using serially diluted samples. Melting curve analysis was used to detect nonspecific amplification.

### **S2. Co-occurrence between CRGs/ARGs subtypes and microbial taxa**

Figure 5 contains 35 nodes (28 microbial taxa, five CRGs, two ARGs subtypes, and *intl1*) and 130 edges. Some topological properties that are used widely in network analysis were calculated to describe the complex patterns of the interrelationships among ARG subtypes and microbial taxa. The average weighted degree was 2.528. The average network distance between all pairs of nodes, i.e., the average path length, was 1.49 edges with a network diameter of four edges. The average clustering coefficient was 0.352 and the modularity index was 0.504.

**Table S1a.** PCR primers

| Target genes    | Primer Sequences                                                     | Amplicon size(bp) | Annealing temp(°C) | (GenBank accession no.)                                                                                | Reference |
|-----------------|----------------------------------------------------------------------|-------------------|--------------------|--------------------------------------------------------------------------------------------------------|-----------|
| <i>erm(A)</i>   | TCTAAAAAGCATGTAAAAGAA<br>CTTCGATAGTTTATTAATATTAGT                    | 641               | 52                 | PRJNA352260                                                                                            | [1]       |
| <i>erm(B)</i>   | GATACCGTTTACGAAATTGG<br>GAATCGAGACTTGAGTGTGC                         | 364               | 58                 | X52632                                                                                                 | [2]       |
| <i>erm(C)</i>   | TCA AAA CAT AAT ATA GAT AAA<br>GCT AAT ATT GTT TAA ATC GTC AAT       | 642               | 50                 | M19652                                                                                                 | [2]       |
| <i>erm(T)</i>   | CAT ATA AAT GAA ATT TTG AG<br>ACG ATT TGT ATT TAG CAA CC             | 369               | 51                 | AF310974                                                                                               | [2]       |
| <i>erm(X)</i>   | GAG ATC GGR CCA GGA AGC<br>GTG TGC ACC ATC GCC TGA                   | 488               | 58                 | X51472                                                                                                 | [2]       |
| <i>tcrB</i>     | CATCACGGTAGCTTTAAGGAGATTTTC<br>ATAGAGGACTCCGCCACCATTG                | 663               | 55                 | AY048044.2                                                                                             | [3]       |
| <i>copA</i>     | TGCACCTGACVGGSCAYAT                                                  | 324               | 60                 | M19930<br>CP000075<br>AE016853<br>CP000744<br>EF587902<br>CP000304<br>AE004091<br>AF455751<br>CP000076 | [4]       |
| <i>cusA</i>     | GVACTTCRCGGAACATRCC<br>ATGCSACVGGYGTTGGCTGG<br>CCR TTCAGYTCGGCRATRCC | 410               | 60                 | CU928162.2                                                                                             | [5]       |
| <i>pcoA</i>     | GCTGCAGATGGCCAGTATGTAAA<br>CCCTCGAGCGTAACCGGTCC                      | 147               | 60                 | DQ517526.1                                                                                             | [6]       |
| <i>cueO</i>     | ATGGATATGGAACGGATGAA<br>ATTGCTACAGATGGTGGTT                          | 420               | 50                 | HM565232.1                                                                                             | [7]       |
| <i>intI1</i>    | CTGGATTTTCGATCACGGCACG<br>ACATGCGTGTAATCATCGTCG                      | 473               | 60                 | DQ393784.1                                                                                             | [8]       |
| <i>16s rRNA</i> | CCTACGGGAGGCAGCAG<br>ATTACCGCGGCTGCTGG                               | 193               | 55                 |                                                                                                        | [9]       |

**Table S1b.** The detailed information of qPCR for each target gene.

| <b>Target gene</b> | <b>R<sup>2</sup></b> | <b>amplification efficiencies</b> | <b>Detection limits<br/>(copies/<math>\mu</math>L)</b> |
|--------------------|----------------------|-----------------------------------|--------------------------------------------------------|
| <i>copA</i>        | 0.998                | 91.9%                             | 22                                                     |
| <i>cusA</i>        | 0.992                | 93.3%                             | 28                                                     |
| <i>trcB</i>        | 0.999                | 92.0%                             | 47                                                     |
| <i>pcoA</i>        | 0.991                | 106.9%                            | 57                                                     |
| <i>ermA</i>        | 0.992                | 92.1%                             | 25                                                     |
| <i>ermB</i>        | 0.997                | 91.4%                             | 92                                                     |
| <i>intI1</i>       | 0.995                | 99.2%                             | 35                                                     |
| 16s rRNA           | 0.983                | 92.9%                             | 250                                                    |

**Table S2.** Changes in physical–chemical parameters for three treatments

|        | compost time<br>(days) | pH   | NO <sub>3</sub> <sup>-</sup> -N<br>(mg kg <sup>-1</sup> ) | NH <sub>4</sub> <sup>+</sup> -N<br>(mg kg <sup>-1</sup> ) | exchangeable Cu<br>(mg kg <sup>-1</sup> ) |
|--------|------------------------|------|-----------------------------------------------------------|-----------------------------------------------------------|-------------------------------------------|
| CK     | 0                      | 7.85 | 118.20                                                    | 1046.00                                                   | 3.10                                      |
|        | 2                      | 8.72 | 221.69                                                    | 2187.96                                                   | 3.64                                      |
|        | 7                      | 9.14 | 188.57                                                    | 2386.95                                                   | 3.24                                      |
|        | 14                     | 8.38 | 115.31                                                    | 1440.44                                                   | 2.32                                      |
|        | 21                     | 8.21 | 97.80                                                     | 123.34                                                    | 1.51                                      |
|        | 35                     | 8.51 | 219.66                                                    | 201.00                                                    | 1.49                                      |
| Cu200  | 0                      | 7.68 | 150.31                                                    | 1159.09                                                   | 9.70                                      |
|        | 2                      | 8.80 | 234.35                                                    | 2161.43                                                   | 9.59                                      |
|        | 7                      | 8.88 | 160.95                                                    | 1946.85                                                   | 10.69                                     |
|        | 14                     | 8.15 | 88.75                                                     | 925.64                                                    | 4.87                                      |
|        | 21                     | 8.25 | 75.61                                                     | 275.54                                                    | 2.85                                      |
|        | 35                     | 8.32 | 81.58                                                     | 280.00                                                    | 2.76                                      |
| Cu2000 | 0                      | 7.92 | 158.02                                                    | 1065.70                                                   | 112.84                                    |
|        | 2                      | 8.61 | 219.97                                                    | 3380.73                                                   | 129.57                                    |
|        | 7                      | 9.15 | 222.33                                                    | 3302.46                                                   | 68.67                                     |
|        | 14                     | 8.44 | 125.05                                                    | 2141.44                                                   | 49.77                                     |
|        | 21                     | 7.99 | 68.28                                                     | 49.98                                                     | 40.89                                     |
|        | 35                     | 7.90 | 51.82                                                     | 62.00                                                     | 40.08                                     |

**Table S3a.** Absolute abundance of copper resistance genes and antibiotic resistance\*.

|     |        | <i>copA</i>          | <i>pcoA</i>          | <i>cusA</i>          | <i>tcrB</i>          | <i>ermB</i>          | <i>ermA</i>          | <i>Int1</i>          | 16srRNA              |
|-----|--------|----------------------|----------------------|----------------------|----------------------|----------------------|----------------------|----------------------|----------------------|
| 0d  | CK     | 2.6E+08<br>(8.6E+06) | 5.3E+07<br>(1.8E+06) | 8.7E+07<br>(6.8E+06) | 2.4E+07<br>(7.0E+06) | 6.3E+06<br>(2.4E+06) | 3.2E+07<br>(1.6E+06) | 2.5E+08<br>(3.1E+07) | 4.3E+10<br>(1.4E+09) |
|     | Cu200  | 1.8E+08<br>(1.3E+07) | 3.2E+07<br>(2.6E+06) | 1.4E+08<br>(6.6E+06) | 3.0E+07<br>(2.0E+06) | 1.7E+07<br>(7.3E+06) | 5.0E+07<br>(3.3E+06) | 4.1E+08<br>(5.7E+07) | 4.2E+10<br>(2.4E+09) |
|     | Cu2000 | 1.4E+08<br>(6.7E+06) | 4.6E+07<br>(3.5E+06) | 1.5E+08<br>(7.9E+06) | 3.0E+07<br>(4.2E+06) | 7.8E+06<br>(7.7E+05) | 4.3E+07<br>(5.6E+06) | 5.4E+08<br>(9.6E+07) | 3.2E+10<br>(5.0E+08) |
|     | CK     | 1.8E+09<br>(9.7E+07) | 5.2E+07<br>(4.8E+06) | 4.0E+08<br>(2.7E+07) | 6.3E+07<br>(1.4E+07) | 1.2E+07<br>(7.5E+06) | 2.7E+07<br>(1.6E+06) | 1.9E+09<br>(5.6E+08) | 5.7E+10<br>(3.0E+09) |
|     | Cu200  | 6.0E+08<br>(1.1E+08) | 1.1E+07<br>(6.4E+05) | 2.6E+08<br>(3.9E+07) | 3.7E+07<br>(8.1E+06) | 3.6E+07<br>(1.8E+07) | 2.4E+07<br>(2.9E+06) | 8.5E+08<br>(3.0E+07) | 2.4E+10<br>(2.0E+09) |
|     | Cu2000 | 5.2E+09<br>(3.5E+08) | 2.3E+08<br>(2.8E+07) | 1.1E+09<br>(7.3E+07) | 3.1E+07<br>(1.7E+07) | 3.3E+07<br>(6.7E+06) | 9.1E+07<br>(2.9E+06) | 4.5E+09<br>(7.3E+08) | 9.6E+10<br>(4.0E+09) |
| 7d  | CK     | 9.9E+08<br>(3.1E+08) | 1.2E+08<br>(5.1E+07) | 6.8E+08<br>(7.9E+07) | 4.2E+06<br>(1.7E+06) | 3.1E+07<br>(7.5E+06) | 2.4E+07<br>(1.5E+06) | 1.9E+09<br>(8.1E+07) | 1.9E+11<br>(7.5E+09) |
|     | Cu200  | 1.4E+09<br>(1.1E+08) | 1.9E+07<br>(7.9E+05) | 6.7E+08<br>(9.1E+07) | 8.1E+06<br>(3.3E+06) | 1.3E+08<br>(1.8E+07) | 1.2E+07<br>(1.4E+06) | 9.2E+08<br>(1.4E+08) | 1.0E+11<br>(7.6E+09) |
|     | Cu2000 | 1.5E+09<br>(8.1E+08) | 7.7E+06<br>(8.2E+04) | 4.1E+08<br>(4.9E+07) | 6.8E+06<br>(2.9E+06) | 3.3E+07<br>(6.7E+06) | 2.0E+07<br>(1.6E+06) | 1.2E+09<br>(4.5E+07) | 9.6E+10<br>(6.5E+08) |
|     | CK     | 1.3E+09<br>(7.4E+07) | 2.6E+06<br>(1.9E+06) | 4.7E+08<br>(5.5E+07) | 1.1E+06<br>(1.6E+06) | 2.4E+06<br>(1.1E+06) | 4.8E+06<br>(1.6E+06) | 1.7E+08<br>(3.8E+07) | 4.9E+10<br>(1.6E+08) |
|     | Cu200  | 2.3E+09<br>(3.2E+08) | 5.8E+06<br>(2.7E+06) | 4.8E+08<br>(4.1E+07) | 9.0E+05<br>(1.7E+05) | 3.1E+06<br>(3.1E+05) | 6.7E+06<br>(8.4E+05) | 2.7E+08<br>(1.9E+07) | 6.3E+10<br>(5.1E+09) |
|     | Cu2000 | 8.5E+08<br>(9.9E+07) | 9.8E+06<br>(2.1E+06) | 1.3E+08<br>(1.7E+07) | 3.4E+06<br>(1.6E+06) | 4.4E+06<br>(1.1E+06) | 7.7E+06<br>(9.2E+05) | 3.0E+08<br>(1.1E+07) | 1.5E+10<br>(4.8E+08) |
| 21d | CK     | 9.2E+08<br>(3.7E+08) | 5.8E+06<br>(8.8E+05) | 8.8E+08<br>(9.9E+07) | 2.0E+06<br>(1.2E+06) | 2.4E+06<br>(7.4E+05) | 1.8E+06<br>(1.1E+05) | 2.5E+08<br>(3.8E+07) | 5.8E+10<br>(4.3E+09) |
|     | Cu200  | 3.7E+09<br>(9.2E+08) | 5.6E+05<br>(3.0E+05) | 1.0E+09<br>(5.3E+07) | 8.2E+05<br>(5.1E+05) | 2.5E+06<br>(4.0E+05) | 1.8E+06<br>(6.7E+04) | 1.6E+08<br>(1.9E+07) | 5.9E+10<br>(2.1E+09) |
|     | Cu2000 | 1.7E+09<br>(9.9E+07) | 2.8E+06<br>(9.1E+05) | 8.8E+08<br>(7.1E+06) | 3.9E+06<br>(1.3E+06) | 3.0E+06<br>(2.5E+05) | 9.7E+06<br>(1.4E+06) | 4.0E+08<br>(1.1E+07) | 6.1E+10<br>(1.1E+09) |
|     | CK     | 1.9E+09<br>(1.6E+08) | 1.6E+07<br>(1.2E+07) | 9.5E+08<br>(6.9E+07) | 9.7E+05<br>(3.7E+05) | 2.2E+06<br>(3.5E+05) | 1.7E+06<br>(2.0E+05) | 2.1E+08<br>(1.6E+07) | 6.1E+10<br>(2.8E+09) |
|     | Cu200  | 3.4E+09<br>(5.5E+08) | 1.6E+06<br>(6.2E+05) | 5.1E+08<br>(2.2E+07) | 3.7E+05<br>(5.3E+04) | 1.3E+06<br>(3.6E+05) | 1.2E+06<br>(1.7E+05) | 1.5E+08<br>(1.5E+07) | 3.2E+10<br>(1.1E+09) |
|     | Cu2000 | 4.2E+09<br>(1.4E+09) | 1.7E+04<br>(4.6E+03) | 8.5E+08<br>(9.0E+07) | 2.9E+06<br>(1.5E+06) | 8.4E+05<br>(8.3E+03) | 3.0E+06<br>(2.6E+05) | 2.2E+08<br>(1.2E+07) | 3.9E+10<br>(7.1E+08) |

\*mean  $\pm$  (S.E.)

**Table S3b.** The dynamic changes of log transformed gene copies during swine manure composting

| Target genes | Control |     |     |     |     |     | Cu200 |     |     |     |     |     | Cu2000 |     |     |     |     |     |
|--------------|---------|-----|-----|-----|-----|-----|-------|-----|-----|-----|-----|-----|--------|-----|-----|-----|-----|-----|
|              | D0      | D2  | D7  | D14 | D21 | D35 | D0    | D2  | D7  | D14 | D21 | D35 | D0     | D2  | D7  | D14 | D21 | D35 |
| <i>copA</i>  | 8.4     | 9.3 | 9.0 | 9.1 | 9.0 | 9.3 | 8.3   | 8.8 | 9.1 | 9.4 | 9.6 | 9.5 | 8.1    | 9.7 | 9.2 | 8.9 | 9.2 | 9.6 |
| <i>pcoA</i>  | 7.7     | 7.7 | 8.1 | 6.4 | 6.8 | 7.2 | 7.5   | 7.0 | 7.3 | 6.8 | 5.7 | 6.2 | 7.7    | 8.4 | 6.9 | 7.0 | 6.4 | 4.2 |
| <i>cusA</i>  | 7.9     | 8.6 | 8.8 | 8.7 | 8.9 | 9.0 | 8.1   | 8.4 | 8.8 | 8.7 | 9.0 | 8.7 | 8.2    | 9.0 | 8.6 | 8.1 | 8.9 | 8.9 |
| <i>tcrB</i>  | 7.4     | 7.8 | 6.6 | 6.1 | 6.3 | 6.0 | 7.5   | 7.6 | 6.9 | 6.0 | 5.9 | 5.6 | 7.5    | 7.5 | 6.8 | 6.5 | 6.6 | 6.5 |
| <i>ermA</i>  | 7.5     | 7.4 | 7.4 | 6.7 | 6.3 | 6.2 | 7.7   | 7.4 | 7.1 | 6.8 | 6.2 | 6.1 | 7.6    | 8.0 | 7.3 | 6.9 | 7.0 | 6.5 |
| <i>ermB</i>  | 6.8     | 7.1 | 7.5 | 6.4 | 6.4 | 6.3 | 7.2   | 7.6 | 8.1 | 6.5 | 6.4 | 6.1 | 6.9    | 7.5 | 7.5 | 6.6 | 6.5 | 5.9 |
| <i>intI1</i> | 8.4     | 9.3 | 9.3 | 8.2 | 8.4 | 8.3 | 8.6   | 8.9 | 9.0 | 8.4 | 8.2 | 8.2 | 8.7    | 9.7 | 9.1 | 8.5 | 8.6 | 8.3 |

**Table S4.** The Spearman's correlation analysis between relative abundances of CRGs, ARGs, *intl1* and exchangeable Cu during the swine manure composting

|              | <i>copA</i> | <i>CusA</i> | <i>pcoA</i> | <i>trcB</i> | <i>emA</i> | <i>emB</i> | <i>Intl1</i> | Cu      |
|--------------|-------------|-------------|-------------|-------------|------------|------------|--------------|---------|
| <i>copA</i>  | 1           | 0.723**     | -0.388**    | -0.411**    | -0.365**   | -0.303*    | -0.139       | -0.031  |
| <i>CusA</i>  |             | 1           | -0.590**    | -0.408**    | -0.580**   | -0.463**   | -0.352**     | -0.245  |
| <i>pcoA</i>  |             |             | 1           | 0.572**     | 0.724**    | 0.516**    | 0.670**      | 0.326*  |
| <i>trcB</i>  |             |             |             | 1           | 0.747**    | 0.492**    | 0.639**      | 0.399** |
| <i>emA</i>   |             |             |             |             | 1          | 0.645**    | 0.787**      | 0.662** |
| <i>emB</i>   |             |             |             |             |            | 1          | 0.721**      | 0.535** |
| <i>Intl1</i> |             |             |             |             |            |            | 1            | 0.716** |
| Cu           |             |             |             |             |            |            |              | 1       |

\* Correlation significant at  $p < 0.05$ .

\*\* Correlation significant at  $p < 0.01$ .



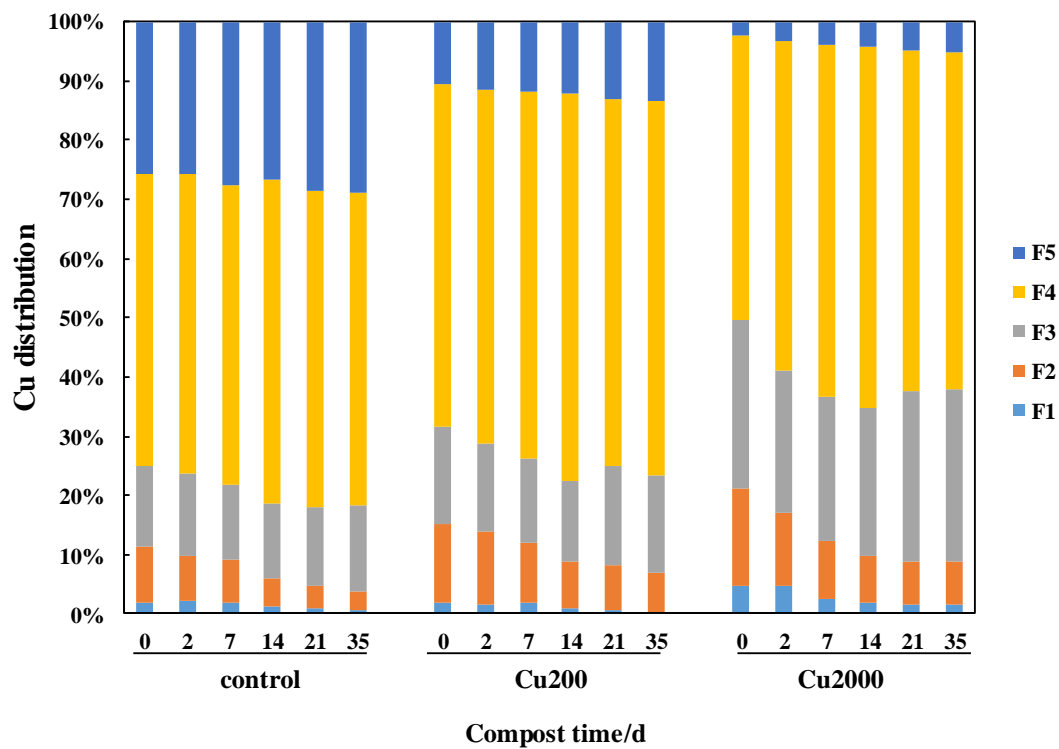

**Figure S1.** Changes in Cu speciation during manure composting of control (A), Cu200 (B) and Cu2000(C), respectively.

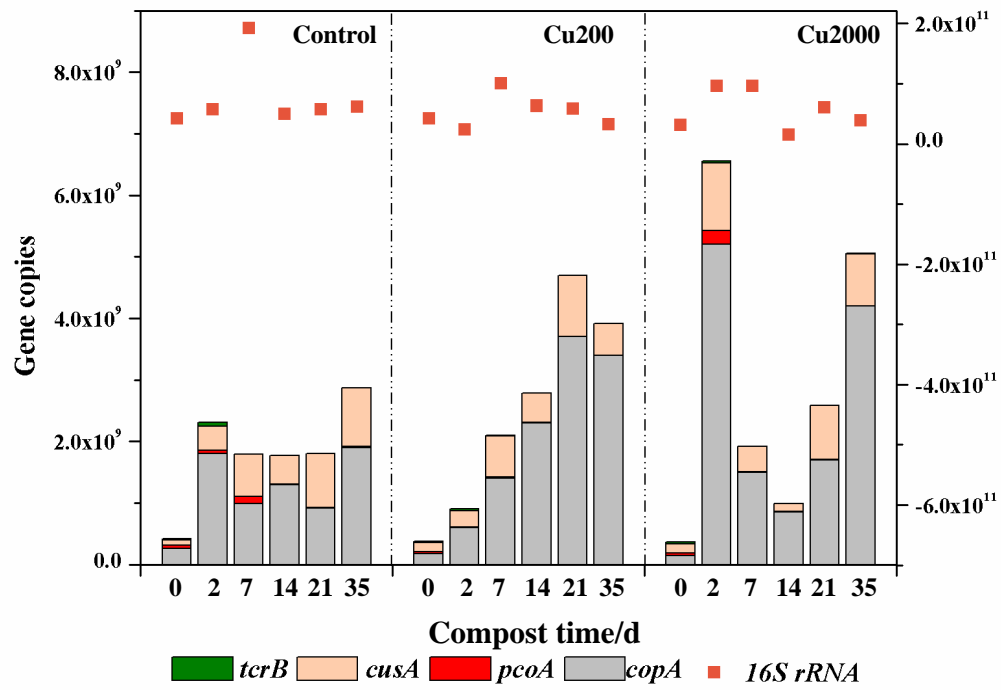

**Figure S2.** Changes of absolute abundance CRGs and 16S rRNA gene during manure composting of control (A), Cu200 (B) and Cu2000(C), respectively.

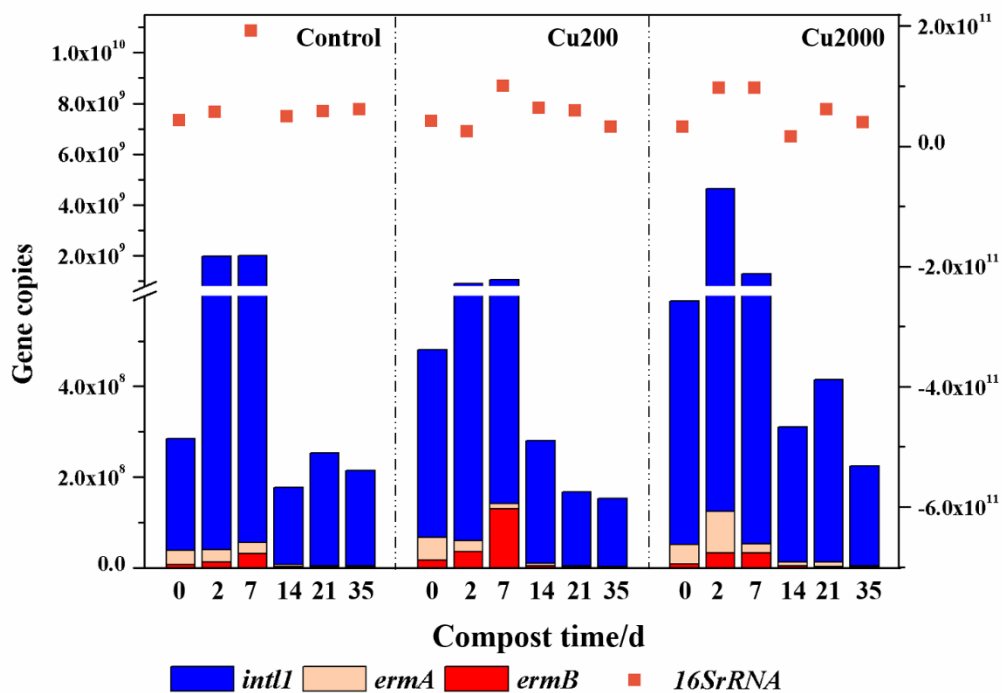

**Figure S3.** Changes of absolute abundance ARGs and *intI1* gene during manure composting of control (A), Cu200 (B) and Cu2000 (C), respectively.

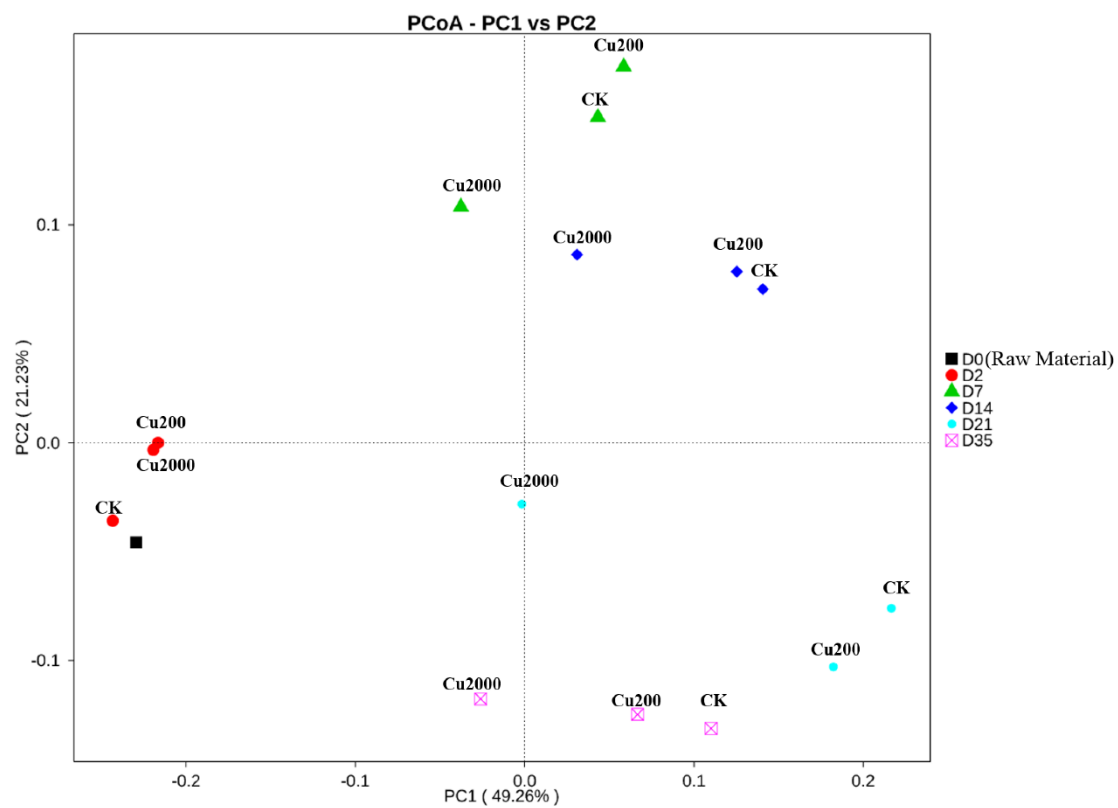

**Figure S4.** Principal coordinate analysis of the bacterial communities during manure composting of control (A), Cu200 (B) and Cu2000 (C), respectively.

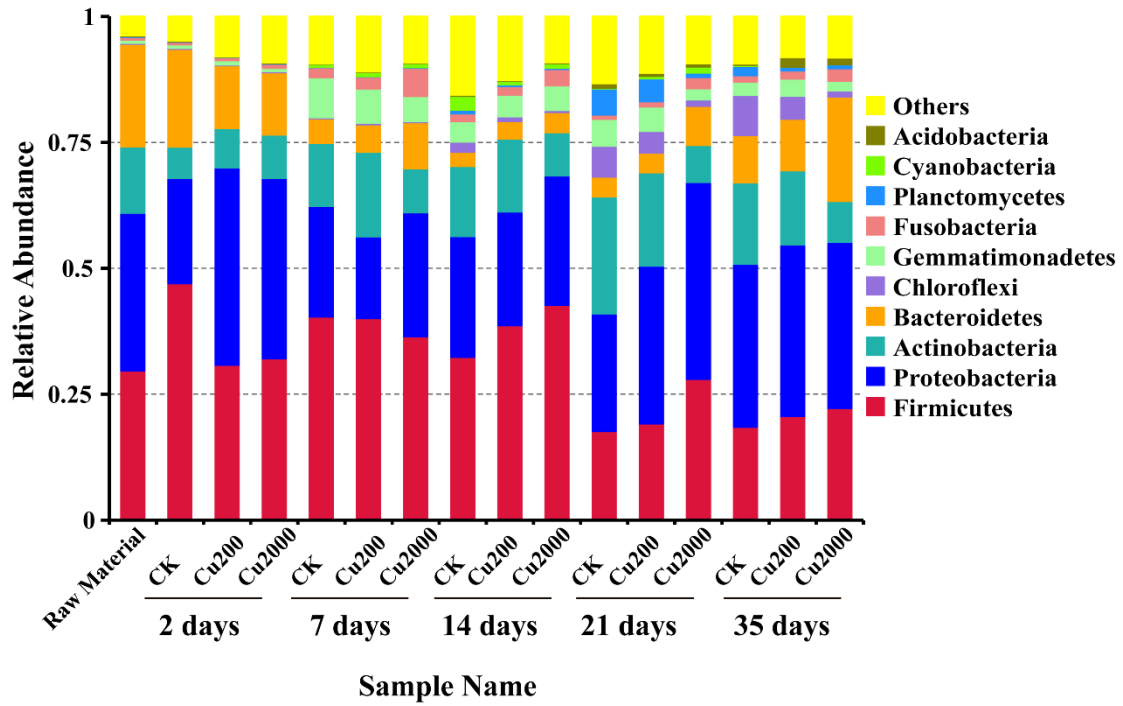

**Figure S5.** Variations in the main phyla detected during manure composting of control (A), Cu200 (B) and Cu2000 (C), respectively.

## References:

- [1] Chung, W.O., Werckenthin, C., Schwarz, S., Roberts, M.C., 1999. Host range of the ermF rRNA methylase gene in bacteria of human and animal origin. *J. Antimicrob. Chemoth.* 43, 5–14.
- [2] Chen, J., Yu, Z., Jr, M.F., Wittum, T., Morrison, M., 2007. Development and application of real-time PCR assays for quantification of erm genes conferring resistance to macrolides-lincosamides-streptogramin B in livestock manure and manure management systems. *Appl. Environ. Microbiol.* 73, 4407–4416.
- [3] Hasman, H., Kempf, I., Chidaine, B., Cariolet, R., Ersbøl, A.K., Houe, H., Bruun Hansen, H.C., Aarestrup, F.M., 2006. Copper resistance in *Enterococcus faecium*, mediated by the tcrB gene, is selected by supplementation of pig feed with copper sulfate. *Appl. Environ. Microbiol.* 72, 5784–5789.
- [4] Li, X.F., Yin, H.B., Su, J.Q., 2012. An Attempt to Quantify Cu-Resistant Microorganisms in a Paddy Soil from Jiaxing, China. *Pedosphere.* 22, 201–205.
- [5] Besaury, L., Bodilis, J., Delgas, F., Andrade, S., Iglesia, R.D.L., Ouddane, B., Quillet, L., 2013. Abundance and diversity of copper resistance genes *cus A* and *cop A* in microbial communities in relation to the impact of copper on Chilean marine sediments. *Mar. Pollut. Bull.* 67, 16–25.
- [6] Xiong, W., Zeng, Z., Zhang, Y., Ding, X., Sun, Y., 2015. Fate of metal resistance genes in arable soil after manure application in a microcosm study. *Ecotoxicol.*

Environ. Saf. 113, 59–63.

- [7]Zhang J, Chen M, Sui Q, et al. Impacts of addition of natural zeolite or a nitrification inhibitor on antibiotic resistance genes during sludge composting.[J]. Water Research, 2016, 91(9):1286-91.
- [8] Stokes, H. W., Nesbø C. L., Holley, M., Bahl, M. I., Gillings, M. R., Boucher, Y., 2006. Class 1 integrons potentially predating the association with tn402-like transposition genes are present in a sediment microbial community. J. Bacteriol. 188, 5722–5730.
- [9]Aminov, R. I., Chee-Sanford, J. C., Garrigues, N., Teferedegne, B., Krapac, I. J., White, B. A., Mackie, R. I. Development, validation, and application of PCR primers for detection of tetracycline efflux genes of gram-negative bacteria. Appl. Environ. Microbiol. 68, 1786–1793.
